1 Classification: Biological Sciences

2

3

4

5 **Telomere shortening produces an inflammatory environment that**  
6 **promotes tumor invasiveness in zebrafish**

7

8 Kirsten Lex<sup>1\*</sup>, Mariana Maia Gil<sup>1\*</sup>, Margarida Figueira<sup>1</sup>, Marta Marzullo<sup>1</sup>, Bruno Lopes-

9 Bastos<sup>1,3</sup>, Kety Giannetti<sup>1</sup>, Tania Carvalho<sup>2</sup> and Miguel Godinho Ferreira<sup>1,3</sup>

10

11 <sup>1</sup> Instituto Gulbenkian de Ciência, 2781-901 Oeiras, Portugal

12 <sup>2</sup> Histology and Comparative Pathology Laboratory, Instituto de Medicina Molecular, 1649-  
13 028 Lisbon, Portugal

14 <sup>3</sup> Institute for Research on Cancer and Aging of Nice (IRCAN), INSERM U1081 UMR7284  
15 CNRS, 06107 Nice, France.

16

17 \* These authors contribute equally in this work

18

19

20

21

22

23

24 Corresponding Author: [Miguel-Godinho.FERREIRA@unice.fr](mailto:Miguel-Godinho.FERREIRA@unice.fr)

25

26 Keywords: Telomeres, Telomerase, Cancer, Inflammation, Aging

27

## 28 Abstract

29 Cancer incidence increases exponentially with age, when human telomeres are  
30 shorter. Similarly, telomerase mutant zebrafish (*tert*) have premature short telomeres and  
31 anticipate cancer incidence to younger ages. However, because short telomeres constitute a  
32 road block to cell proliferation, telomere shortening is currently viewed as a tumor suppressor  
33 mechanism and should protect from cancer. This conundrum is not fully understood. In our  
34 current study, we report that telomere shortening promotes cancer in a non-cell autonomous  
35 manner. Using zebrafish chimeras, we show increased incidence of invasive melanoma when  
36 WT tumors are generated in *tert* mutant zebrafish. *tert* zebrafish show increased levels of  
37 senescence (*cdkn2a* and *ink4a/b*) and inflammation (*TNF-α*). In addition, we transferred  
38 second generation *tert* blastula cells into WT to produce embryo chimeras. Cells with very  
39 short telomeres induced senescence and increased neutrophil numbers in surrounding larval  
40 tissues in a non-cell autonomous manner, creating an inflammatory environment. Considering  
41 that inflammation is pro-tumorigenic, we transplanted melanoma-derived cells into second  
42 generation *tert* zebrafish embryos and observed that tissue environment with short telomeres  
43 leads to increased micrometastasis. To test if inflammation was necessary for this effect, we  
44 treated melanoma transplants with non-steroid anti-inflammatory drugs and show that higher  
45 melanoma invasiveness can be averted. Thus, apart from the cell autonomous role of short  
46 telomeres in contributing to genome instability, we propose that telomere shortening with age  
47 causes systemic chronic inflammation leading to increased tumor incidence.

48

49

## 50      **Significance Statement**

51              Cancer incidence increases exponentially in human midlife. Even though mutation  
52      accumulation in somatic tissues results in increased tumorigenesis, it is currently not  
53      understood how aging contributes to cancer. Telomeres, the ends of eukaryotic linear  
54      chromosomes, shorten with each cell division. Here we show that telomere shortening  
55      contributes to cancer in a non-cell autonomous manner. Using embryo chimeras of  
56      telomerase deficient zebrafish generated from melanoma-prone fish, we show that tumors  
57      arise more frequently and become more invasive in animals with shorter telomeres. Telomere  
58      shortening gives rise to increased senescence and systemic inflammation. We observed  
59      increased melanoma metastasis dissemination in zebrafish larvae with very short telomeres.  
60      Thus, telomere shortening similar to human aging, generates a chronic inflammatory  
61      environment that increases cancer incidence.

62

## 63 Introduction

64 Cancer incidence increases exponentially in the mid-decades of human life (1).  
 65 Although mutations are required to build-up during tumorigenesis, the overall post-  
 66 reproductive incidence opens the possibility of organism-based causes for the increase of  
 67 cancer with age. Due to absence of telomerase expression in most somatic tissues, telomeres  
 68 shorten as we grow older (2). Telomeres constitute the ends of eukaryotic chromosomes and  
 69 are constituted by repetitive DNA sequences (TTAGGG)<sub>n</sub> recognized by a protein complex  
 70 called shelterin (3). This structure prevents chromosome-ends from being recognized as  
 71 deleterious DNA double strand breaks while counteracting their slow attrition, resulting from  
 72 the “end-replication problem” by recruiting telomerase. Humans are born with telomeres  
 73 between 10-15 kb long (4) and, due to continuous cell divisions, telomeres may reach a  
 74 critical length. As cell division reaches the Hayflick limit, telomeres are recognized as DNA  
 75 damage and block cell proliferation either by undergoing senescence or apoptosis (5–7).  
 76 Since short telomeres block cell division, telomere shortening is considered as a tumor  
 77 suppressor mechanism by preventing excessive cell proliferation. Indeed, telomerase is  
 78 frequently re-activated in the majority of cancer cells, allowing for cell immortalization  
 79 thereby escaping replicative senescence. In line with this idea, anti-telomerase therapies are  
 80 currently undergoing clinical trials for cancer therapy (8).

81 Countering the tumor suppressor hypothesis, telomere shortening may lead to genome  
 82 instability, a hallmark of cancer. Because loss of telomere protection results in breakage-  
 83 fusion-bridge cycles, the ensuing genome instability may contribute for age-dependent  
 84 tumorigenesis (9). An extreme example of the pro-tumorigenic effect of short telomeres  
 85 occurs in “telomeropathies”. People carrying mutations in telomerase or related proteins have  
 86 pathologically short telomeres in early life (10, 11). Despite exhibiting pathologies related to  
 87 deficiencies in cell proliferation, patients also suffer from an increased cancer risk (12).

88 Similarly, our work on the telomerase mutant zebrafish, which undergoes premature telomere  
89 shortening, revealed that they anticipate cancer incidence to early life (13). Even though short  
90 telomeres positively correlate with increased tumorigenesis in both humans and zebrafish, it  
91 is not yet understood how telomere shortening may lead to cancer.

92       Telomere shortening has consequences beyond the cellular level. As cells approach  
93 replicative senescence, DNA damage emanating by short telomeres initiate a cascade of  
94 events that expands to the extracellular environment. Senescent cells were shown to release a  
95 set of molecules termed senescence-associated secretory phenotype (SASP) (14). SASP was  
96 described *in vitro* and is mainly constituted by chemokines, growth factors, extra cellular  
97 matrix remodelers and other inflammatory factors, capable of modulating cell environment.  
98 These molecules were posteriorly shown to influence the ability of other cells to divide,  
99 potentially having a pro-tumorigenic effect (15). Consistently, repeated wounding in  
100 zebrafish stimulates inflammatory responses, which were shown to promote cancer  
101 progression (16, 17). Therefore, we hypothesize that telomere shortening contribution to  
102 tumorigenesis may have a non-cell autonomous component. In aging organisms, cells  
103 undergoing replicative senescence would comprise a source of SASP/inflammatory factors  
104 creating a pro-tumorigenic environment. In agreement with our hypothesis, population  
105 studies have associated the long-term use of anti-inflammatory agents (acetylsalicylic acid)  
106 and a reduction risk of several cancers (18–20).

107       Here we show that tissues containing cells with short telomeres promote increased  
108 cancer incidence in a non-cell autonomous manner. Using chimeric zebrafish, we observed  
109 that telomerase-proficient melanocytes expressing HRAS give rise to more melanoma tumors  
110 when surrounded by *tert* mutant cells. Melanomas developed in this environment exhibited  
111 high invasiveness as observed by histopathology. In agreement, using zebrafish tumor  
112 transplants, we show that HRAS melanoma cells expand faster when injected into second-

generation (G2) *tert* mutant larvae. Both adult G1 *tert* and G2 *tert* larvae have higher levels of senescence and SASP/inflammation. G2 *tert* cells injected into WT embryos stimulate senescence and inflammation in a non-cell autonomous manner. Chemical inhibition of inflammation in G2 *tert* embryos rescued the invasiveness capacity of melanoma cells. Thus, cells with short telomeres are capable of inducing senescence and inflammation, creating a pro-tumorigenic environment that results in higher cancer invasiveness.

## Results

### ***tert* mutant environment causes higher tumor incidence in a non-cell autonomous manner**

Similar to mammals, zebrafish tumor microenvironment (TME) modulates cancer behavior (21, 22). Tumors may be inhibited or enhanced as a consequence of the dynamic crosstalk between cancer and surrounding cells. We, therefore, asked what were the effects of a TME with short telomeres on emergent tumors.

In order to study the non-cell autonomous effects of TME telomere shortening in cancer, we wanted to separate telomerase expression of pre-cancer cells from their surrounding tissues and, for this purpose, we generated chimeric zebrafish using early-developmental embryo transplants. We used a melanoma zebrafish model (*mitfa*:HRAS) developed by the Hurlstone lab that exhibits full penetrance by 3 months of age (23). We chose this model since it did not require an initial *tp53* dysfunction to form tumors and we had previously shown that loss of p53 function rescues *tert* zebrafish mutants (24). Blastula cells from donor embryos capable of giving rise to melanoma were transplanted into WT or *tert*<sup>-/-</sup> recipients (Fig 1A). In addition, recipient embryos had a *casper* genetic background (*mitfa*<sup>w2/w2</sup>; *mpv17*<sup>a9/a9</sup>), and lacked the ability to produce melanocytes. Consequently, all

melanoma could only arise from donor cells. Embryo chimeras then were allowed to grow into adulthood and studied for tumor incidence. As expected, we observed the development of melanoma lesions, typically in the anal fin region of both WT and *tert*<sup>-/-</sup> recipient fish (Fig. 1B). However, by 30 weeks, a time when *tert*<sup>-/-</sup> associated lethality is still low (<20%), 20% of WT chimeras developed tumors, while ca. 50% of *tert*<sup>-/-</sup> chimeras exhibited melanoma (Fig. 1C,  $p < 0.05$ ). Thus, we found that *tert*<sup>-/-</sup> recipients significantly increased tumor incidence by ca. 2-fold (Hazard ratio after Mantel-Haenszel calculation: 2.0 when compared with WT fish).

A possible explanation for the observed differences of tumor development in a WT vs. *tert*<sup>-/-</sup> environment is cell competition. Wildtype tumor-prone cells could be fitter and more efficient in outcompeting *tert* mutant recipient cells, possibly due to higher proliferation rates. Thus, fitter donor cells could produce higher number of melanocytes expressing HRAS in *tert* mutant recipients and, subsequently, lead to a higher tumor incidence. To test this hypothesis, we quantified the number of melanocytes at two stages of embryo development at 3- and 11-days post-fertilization (dpf) in both *tert* mutant and WT recipients. Contrary to our hypothesis, we observed no significant increase in the number of melanocytes in *tert*<sup>-/-</sup> recipients as compared to WT during developmental stages (Supplementary Figure 1A-B). In case growth differences would only be visible at later stages, we quantified the surface area covered by the melanocytic lesions in adult animals. Percentage of pigmentation was quantified for WT and *tert*<sup>-/-</sup> zebrafish (Supplementary Figure 1C-D). Similar to the results obtained in larvae, although there was variation between individuals, we did not observe significant differences when comparing host genotypes. Together, our data indicates that a *tert* mutant TME increases tumor incidence in a non-cell autonomous manner, suggesting that telomere shortening has a systemic role in cancer beyond the one described in genome stability.

162

# 163 **Tumors progress faster in *tert* mutant TME**

164       Among the hallmarks of cancer, one qualitative difference between cancers relies on  
165 the capacity to invade different tissues. Zebrafish chimeras bearing melanoma were analyzed  
166 by histopathology and ranked according to their staging and invasiveness. Overall, 84% of  
167 samples (N=43) that were macroscopically defined as tumors were confirmed as malignant  
168 tumors in histopathological analysis (Fig. 2 A-C). The remaining samples were staged as  
169 benign tumors or melanosis. The large majority of tumors in *tert*<sup>-/-</sup> recipients were invasive  
170 (80%, N=10; Fig. 2 B). In comparison, only 22% of tumors exposed to a wildtype  
171 environment (N=9) were determined as invasive (Fig. 2 B). A similar result was found when  
172 malignant tumors were scored for the presence of cellular atypia. Cellular atypia describes  
173 cytologic structural abnormalities and is a marker for more transformed cancers and more  
174 advanced staging (25). Whereas 71% of tumors in a *tert*<sup>-/-</sup> environment (N=7) exhibited  
175 moderate levels of cellular atypia (Fig. 2 C), all tumors in WT recipients showed low levels  
176 (N=5). These results indicate that melanoma developed in *tert*<sup>-/-</sup> recipients progress faster,  
177 reaching advanced stages faster and becoming more invasive, suggesting that TME telomere  
178 shortening not only increase tumor incidence but its progression.

179

# 180 **Zebrafish melanoma transplants are more invasive in *tert* mutant larvae**

181       We and others have shown that injection of tumor cells in zebrafish larvae constitutes  
182 an assay to study invasiveness capacity of cancer cells (26, 27). This constitutes a simpler  
183 assay and allows for more expedite manipulations while being amenable to chemical studies.

184       In order to confirm that *tert*<sup>-/-</sup> TME promotes tumor invasiveness, we injected  
185 melanoma cells derived from HRAS tumors into 2dpf WT and *tert*<sup>-/-</sup> larvae (Fig. 3A). To  
186 ensure that these fish would possess cells with critically short telomeres, we used second

generation *tert*<sup>-/-</sup> (G2 *tert*<sup>-/-</sup>) resulting from an in-cross of young adult *tert*<sup>-/-</sup> zebrafish. In contrast to G1 *tert*<sup>-/-</sup> derived from heterozygous parents, G2 *tert*<sup>-/-</sup> embryos possess very short telomeres and a high mortality with an average longevity of ~12days (28, 29). We dissected melanomas from HRAS tumors expressing GFP (see Methods) and injected cells into the blood circulation of 2dpf larvae. Injected melanoma cells preferentially accumulate in the tail region from where, depending on their invasiveness capacity, disseminate to neighboring tissues (Fig. 3B). Injected larvae were individually followed over time and the area occupied by GFP cells was quantified (Fig. 3B).

If an environment with short telomeres promotes tumor invasiveness, then injected melanoma cells should disseminate more when injected in G2 *tert*<sup>-/-</sup> when compared to WT larvae. We quantified the GFP-area at 1, 4 and 7 days-post injection (Fig. 3C). We calculated the linear regression between the 3 time-points and obtained a progression slope for the expansion of each grafted melanoma (N=31). We observed that *tert*<sup>-/-</sup> recipients allowed for a more accentuated progression than the WT ones (Fig. 3D). Thus, our results using tumor transplants indicate that melanoma cells disseminate faster in G2 *tert*<sup>-/-</sup> than WT larvae, suggesting that telomere shortening in aging individuals could promote tumor progression in a non-cell autonomous manner.

## **G2 *tert*<sup>-/-</sup> cells are senescent and inflammatory and capable of modulating their surrounding environment.**

Telomere shortening is responsible for replicative cell senescence in human cultured cells (30). Accordingly, we expected that *tert*<sup>-/-</sup> zebrafish would present increased levels of senescence. Using RT-qPCR for specific genes, we quantified the levels of senescence in *tert*<sup>-/-</sup> 9month-old adult tissue (intestine) and 4dpf G2 *tert*<sup>-/-</sup> larvae (whole). As expected, the senescence markers *ink4a/b* (p15/16) and *cdkn1a* (p21) levels were significantly higher in

both G1 *tert*<sup>-/-</sup> adults and G2 *tert*<sup>-/-</sup> larvae than in WT controls (Fig. 4A-B). In addition, using the SA- $\beta$ -Gal assay, we confirmed higher levels of senescence localized primarily in the head and notochord of G2 *tert*<sup>-/-</sup> larvae (Fig. 4D).

Senescent cells were shown to secrete a set of molecules, known as SASP, mainly composed of inflammatory factors (14, 15). Therefore, we asked if *tert*<sup>-/-</sup> zebrafish present signs of inflammation. We measured expression levels of TNF- $\alpha$ , one of the main cytokines expressed during an inflammatory response, by RT-qPCR. Indeed, both G1 *tert*<sup>-/-</sup> adults and G2 *tert*<sup>-/-</sup> larvae showed elevated levels of TNF- $\alpha$  when compared to WT (Fig. 4C). Interestingly, undisturbed 9month-old WT zebrafish exhibit higher levels of TNF- $\alpha$  than 4day-old larvae, suggesting that aging animals may respond similarly to young *tert*<sup>-/-</sup> mutants. Together, our results suggest that telomere shortening in zebrafish results in increased senescence and inflammation.

Given the nature of the responses, we wondered if these observations originated from cell-autonomous effects of *tert*<sup>-/-</sup> cells dispersed through the body or if *tert*<sup>-/-</sup> cells could modulate their extracellular environment *in vivo* and generate a systemic response. To test if short telomere *tert*<sup>-/-</sup> cells modulate their extracellular environment, we transplanted GFP-labelled G2 *tert*<sup>-/-</sup> cells during early-development into WT recipient embryos, thereby generating larvae chimeras (Fig. 4E). Even though we transferred few G2 *tert*<sup>-/-</sup> cells into developing embryos (<1% as measured by FACS of desegregated embryos at 4dpf), they were sufficient to increase overall SA- $\beta$ -Gal levels (Fig. 4E). Interestingly, we observed a similar pattern of SA- $\beta$ -Gal staining in these chimeras as in G2 *tert*<sup>-/-</sup> larvae (N=22) at the same stage of 4dpf (compare Fig. 4D with 4E). These results suggest that cells derived from G2 *tert*<sup>-/-</sup> embryos are capable of inducing senescence in a non-cell autonomous manner, thus constituting an example of paracrine SASP.

Since senescent cells secrete pro-inflammatory molecules, we asked if G2 *tert*<sup>-/-</sup> cells

with short telomeres could create an inflammatory environment in newly generated chimeras. To test this, we generated similar embryo chimeras in *Tg(mpx:GFP)* recipient zebrafish that carry GFP-labelled neutrophils (31). As before, we injected both WT and *G2 tert*<sup>-/-</sup> cells from embryos at blastula stage into *Tg(mpx:GFP)* recipient embryos of the same stage and observed its effects in 4dpf larvae (Fig. 4F, right). Whereas WT cells generated zebrafish larvae (N=33) with similar numbers of neutrophils as un-injected embryos, *Tg(mpx:GFP)* chimeras carrying *G2 tert*<sup>-/-</sup> cells (N=25) exhibited higher numbers of neutrophils (Fig. 4F, p=0.0075). Thus, since these innate immune cells are key to inflammatory responses, *G2 tert*<sup>-/-</sup> cells give rise to a systemic inflammatory environment. Together, our results indicate that telomerase deficient zebrafish undergo senescence and produce an inflammatory state. Moreover, we show that this effect is non-cell autonomous with *tert*<sup>-/-</sup> cells impacting the surrounding tissues modulating their environment, creating a senescent and inflammatory environment.

## **Chemical inhibition of inflammation rescues melanoma dissemination in the *G2 tert*<sup>-/-</sup> mutant larvae.**

Inflammation can induce transformed cell growth (32). In zebrafish, PGE<sub>2</sub> produced by innate immune cells via the COX-2 pathway was shown to act as key growth factor at the earliest stages of tumor progression (16, 33). We hypothesized that the inflammatory environment induced by *tert*<sup>-/-</sup> cells could underlie the enhanced melanoma invasiveness observed in *tert* mutant zebrafish. To test this hypothesis, we treated the previously generated zebrafish melanoma larvae allografts with non-steroid anti-inflammatory drugs (NSAIDs): Aspirin (COX-1 and 2 inhibitor) and Celecoxib (COX-2 specific inhibitor). As previously, we measured melanoma invasiveness by quantifying the GFP area at consecutive timepoints upon melanoma cell injections (1, 4 and 7 dpi). Both WT and *G2 tert*<sup>-/-</sup> recipients were kept

in embryo medium containing Aspirin (30 $\mu$ M) or Celecoxib (25 $\mu$ M) for the duration of the experiment. As previously, we calculated a progression slope of tumor cells per transplanted zebrafish and compared treated vs. untreated larvae (Fig. 5A-B). As previously, control groups showed an increased invasiveness of melanoma cells when transplanted into G2 *tert*<sup>-/-</sup> (N=31) than in WT larvae (N=32) (Fig. 5D,  $p = 0.0205$ ). However, upon NSAID treatment, the increased invasion capacity of HRAS cells in G2 *tert*<sup>-/-</sup> larvae (N=20) decreased to WT levels (N=19) (Fig. 5C-D, Aspirin  $p = 0.7897$ ; Celecoxib:  $p = 0.1605$ ). Together, our result suggests that the inflammatory environment induced by *tert*<sup>-/-</sup> cells promotes melanoma invasiveness via the COX-2 pathway. We showed an increase of innate immune cells in larvae containing telomerase deficient cells (Fig. 4F). Thus, in agreement with previous studies (16, 33, 34), we propose that neutrophils, by producing larger amounts of prostaglandins, may enhance melanoma invasiveness.

## Discussion

Studies on how telomerase affects tumorigenesis have focused primarily on the cell-autonomous role of telomere shortening in cancer cells (9). Indeed, telomerase is reactivated in the majority of cancer cells promoting cancer development. Consistently, telomerase promoter mutations that result in increased telomerase expression are now recognized as one of the most common alterations in cancer (35). However, cancer incidence increases exponentially in the mid-ages of human life, a time when telomeres are shorter (1, 2). In our current study, we attempted to understand why cancer incidence increases when telomeres are shorter. Apart from the recognized cell autonomous role in tumor suppression, we propose that telomere shortening affects tumorigenesis in a non-cell autonomous manner. As an organism grows older, increasing numbers of cells with short telomeres modulate their surrounding environment creating a pro-inflammatory milieu that promotes tumorigenesis.

Using zebrafish embryo chimeras and cancer transplants, we show that incidence of melanoma is not only higher but progresses faster in animals deficient for telomerase. Both adult G1 *tert*<sup>-/-</sup> and G2 *tert*<sup>-/-</sup> embryos have shorter telomeres and mount DNA damage responses that stabilize p53 leading to premature aging and death (13, 28, 29). Indeed, mutations in *tp53* rescue the severity of both *tert*<sup>-/-</sup> models, allowing for prolonged survival. Spontaneous cancer in zebrafish, as in humans, is an age-associated disease that quickly rises upon decline of reproductive age (13, 36). Like other age-related phenotypes, spontaneous tumors in *tert*<sup>-/-</sup> zebrafish are accelerated to younger ages, while remaining similar in incidence and spectrum. Indeed, telomerase deficiency and telomere shortening in zebrafish do not appear to restrain tumorigenesis. Rather, they promote early cancer incidence denoting a systemic role in their effects. Similarly, humans with deficiencies in telomerase and premature telomere shortening show an increased cancer predisposition at younger ages (12). Thus, beyond preventing uncontrolled cell proliferation, absence of telomerase and telomere

shortening appear to have a systemic role impairing health status and resistance to disease.

How could telomere shortening in surrounding tissues lead to increased incidence of cancer? We observed that *tert*<sup>-/-</sup> zebrafish present high levels of senescence. Studies *in vitro* revealed that senescent cells secrete SASP, composed by several inflammatory factors (14, 15). In agreement, we observed that *tert*<sup>-/-</sup> zebrafish present high levels of *cdkn1a* and *ink4ab* senescence genes and TNF- $\alpha$ , a cytokine involved in systemic inflammation. Moreover, G2 *tert*<sup>-/-</sup> cells are capable of inducing systemic senescence and inflammation in a non-cell autonomous manner. This data constitutes a strong indication that cells with short telomeres are a source of paracrine SASP *in vivo*. However, similar to other studies in zebrafish (37), we were unable to detect other typical SASP cytokines in *tert*<sup>-/-</sup> zebrafish larvae, such as IL6 and IL10. The main *in vivo* SASP molecules are yet to be identified in zebrafish.

Consistent with higher levels of inflammatory cytokines, G2 *tert*<sup>-/-</sup> cells containing critically short telomeres can modulate their environment by increasing the number of neutrophils. An increase in innate immune cells is characteristic of an inflammatory environment which can be tumorigenic. Human skin cancers have been shown to increase upon repeated injury and ulcers of previous lesions (38). In zebrafish, Feng *et al.* showed that preventing the recruitment of innate immune cells reduced the growth of HRAS<sup>G12V</sup>-transformed cells (16). Moreover, PGE2 produced by immune cells were shown to constitute a source of supportive signals for cancer cell growth. In line with this study, we observed a reduction of melanoma invasiveness with anti-inflammatory treatment, such as Aspirin and Celecoxib. Thus, our results suggest that G2 *tert*<sup>-/-</sup> cells with short telomeres promote the tumor invasiveness through the COX-2 pathway.

Collectively, our data indicates that an environment with short telomeres promotes tumorigenesis in a non-cell autonomous manner and increases the invasiveness capacity of melanoma cells. Apart from the recognized cell autonomous role in blocking uncontrolled

cell division, telomere shortening and senescence may have a second, perhaps, antagonistic pleiotropic consequence of causing local tissue damage and chronic inflammation. Thus, we propose that telomere shortening during aging gives rise to a systemic inflammatory environment. Chronic inflammation may be part of the mechanism whereby telomere shortening leads to increase tumorigenesis with age. Indeed, whereas chronic inflammation was shown to be a contributing factor in several cancers, immunosuppression leads to increase the risk for certain tumors (39, 40). Epidemiology studies associate the long-term dosage of Aspirin with a reduced incidence of certain types of cancer (18–20). Interestingly, this effect is more pronounced with increased age of the population. Reverting telomere shortening in animal models that possess short telomeres, such as the zebrafish, will conclusively test the idea if repression of telomerase promotes cancer in aging.

## Materials and Methods

### Ethics statement

All Zebrafish work was conducted according to National Guidelines and approved by the Ethical Committee of the Instituto Gulbenkian de Ciência and the DGAV (Direcção Geral de Alimentação e Veterinária, Portuguese Veterinary Authority).

### Zebrafish maintenance and standard techniques

Zebrafish were maintained in accordance with Institutional and National animal care protocols. For normal line maintenance embryos were collected from crosses and kept in E3 embryo medium (5.0mM NaCl, 0.17mM KCl, 0.33mM CaCl<sub>2</sub>, 0.33mM MgSO<sub>4</sub>, 0.05% methylene blue, pH 7.4) at 28°C on a 14h light/10h dark cycle. At 5-6dpf larvae were transferred into a recirculating system at 28°C, with a 14h light/10h dark cycle. For anesthesia, fish were immersed into tricaine methane sulfonate solution at 168µg/L

(MS222 Sigma) and after the procedure placed back into system water. Their recovery was monitored until they regained normal swimming ability. Tricaine methane sulfonate was used at high concentration (200mg/L) to sacrifice fish. Larvae (until 7dpf) were sacrificed by placing them in ice-cold water for longer than 20min.

### **Transgenic and mutant zebrafish lines**

The telomerase mutant line *tert*<sup>AB/hu3430</sup> generated by N-Ethyl-N-nitrosourea (ENU) mutagenesis (Utrecht University, Netherlands; Wienholds, 2004), has a T→A point-mutation in the *tert* gene and is available at the ZFIN repository, ZFIN ID: ZDB-GENO-100412-50, from the Zebrafish International Re-source Center – ZIRC. The *tert*<sup>hu3430</sup> mutation was combined by genetic crossing in a *casper* background strain leading to the complete lack of pigmentation (41). For maintenance of this line, *casper; tert*<sup>AB/hu3430</sup> was continuously outcrossed to *casper; tert*<sup>+/+</sup>. All recipient embryos used for the generation of HRAS chimeras, *tert*<sup>hu3430/hu3430</sup> homozygous mutants (referred to as *tert*<sup>-/-</sup>) as well as their WT siblings were obtained by incrossing *casper; tert*<sup>AB/hu3430</sup> animals. Donor embryos carry two different transgenes: Tg(*mitfa*:HRAS<sup>G12</sup>-*mitfa*:GFP; *β-actin*:mGFP)). They express GFP and a mutated and oncogenic version of human HRAS under a melanocyte-specific promoter *mitfa* causing strong hyperpigmentation and the formation of melanoma (23). We used a Tg(*β-actin*:mGFP) line with ubiquitous expression of membrane bound-GFP (mGFP) (42), since *mitfa*:GFP is only visible upon melanocyte development.

### **Generation of zebrafish chimeras**

Both donor and recipient embryos were manually dechorionated using forceps (not earlier than 16 cell-stage). Dechorionated embryos were maintained in transplant-media (14.97mM NaCl; 503μM KCl; 1.29mM CaCl<sub>2</sub> · 2H<sub>2</sub>O; 150.63μM KH<sub>2</sub>PO<sub>4</sub>; 50μM Na<sub>2</sub>HPO<sub>4</sub>; 994.04μM MgSO<sub>4</sub> · 7H<sub>2</sub>O) with penicillin/streptomycin (100U/ml penicillin and 100μg/ml streptomycin) in agarose-coated plates until 48hpf after which they were transferred into E3

embryo medium in non-coated petri dishes. Cell transfer from donor to recipient embryo was performed at blastula-stage using a hydraulic, manual microinjector (CellTram® vario, Eppendorf) with needles pulled from capillaries (TW100-4, World precision instruments, with a tip clipped off and polished of inner diameter at the tip 40-45µm) using a fluorescent stereoscope (Leica M205FA). Labelled donor cells (GFP+) were taken from *Tg(mitfa:HRAS<sup>G12</sup>-mitfa:GFP; β-actin:mGFP)* embryos and injected into recipient embryos. Cells were taken up by gentle suction directly at the blastula surface and released by injecting into the blastula of the recipient without ever harming the yolk cell. To increase the likelihood of transferring neural crest progenitors for tumor studies in adult animals, cells were typically taken from 3-5 spots at different sides of the donor embryo, all aligned midway between animal pole and yolk cell. Directly upon transfer, around 5% (estimation) of cells in a chimeric embryo were donor-derived. Single donor embryos served usually for various recipients (up to four), but one recipient never received cells from mixed donors. Upon cell transfer embryos were kept at low density (max 50 per plate) at 28°C and cleaned daily.

### **Selection of Chimeras to grow and tumor assessment**

All animals included in this study were screened for a normal phenotype, presence of melanocytes and presence of GFP-positive donor cells. This screening was done under light anesthesia (84µg/L tricaine methane sulfonate MS222 in E3 embryo medium, 50% of standard concentration) under a Fluorescence stereomicroscope (Leica M205FA). Tumor appearance was assessed weekly and macroscopically. Individual animals were scored for the onset of a vertical growth phase, the presence of an outgrowth in any direction. Subsequently, most animals were analyzed by histopathology to confirm tumor formation and the state of invasiveness.

### **Fish preservation for histology**

When possible, fish were food-deprived for 24h prior to processing. After sacrificing, pictures of each fish were taken from both sides, both with a regular camera and at the fluorescent stereoscope (Leica M205FA) to save information about the gross distribution of pigmentation and chimeric (GFP+) cells. Animals were fixed in 10% neutral buffered formalin for 72h at room temperature and decalcified in 0.5M EDTA for 48h. Whole fish were paraffin embedded and 3µm transversal cuts were done from 5-8 regions of the fish (depending on size). Cuts were stained with haematoxylin and eosin and analyzed by histopathology. A total of N=18 animals was analyzed (9 WT and 9 *tert*<sup>-/-</sup> recipients).

# **Melanoma cell transplants into 2dpf larvae**

Melanoma cells were derived from Tg(*mitfa*:*HRAS*<sup>G12</sup>-*mitfa*:*GFP*) zebrafish tumors. To obtain the tumor cells fish were first sacrificed with tricaine 25x and the tumor was dissected with a regular scalpel and scissors. To dissociate the tumor, the mass of cells was dissected in small pieces, placed in a tryple solution and pipetted up and down. Enzymatic reaction was stop with the addition of FBS (10% of total volume). Solution was filtered (70µm filter) and spun down at 1700 rpm for 5 min. The pellet was re-suspended in PBS calcium/magnesium free and then washed in culture medium with PBS (DMEM + 10% FBS). The final solution was approximately 1x10<sup>7</sup> cells/mL and was obtained by removing as much as possible supernatant in the last centrifugation.

Melanoma cells were injected into the circulation of 2dpf larvae with a microinjection apparatus and needles were pulled from capillaries (TW100-4, World precision instruments). Transplanted larvae were kept overnight at 28°C in embryo media. In the following day larvae are screened for the presence of GFP positive cells in the tail region and only those continue in the experiment. Pictures were taken at 1, 4 and 7 days-post injection using a fluorescent stereoscope (Leica M205FA). Transplanted larvae were kept in individual wells of a 6 well-plate to allow individual tracking of melanoma progression. Control (E3) or

treatment (Aspirin - 30 $\mu$ M; Celecoxib – 25 $\mu$ M dissolved in DMSO) media were replaced daily. These experiments were repeated 2-3 times. GFP area was quantified using the Analyze Particles tool of imageJ 1.52i software.

### **Statistical analysis**

Statistical analysis was done with the Software GraphPad Prism 6. Comparisons of two different points were done by unpaired t-test. For the G1 HRAS chimeras, comparison over time (for at least 2 timepoints) was performed by Two-way RM ANOVA. Tumor onset over time was compared using a Log-rank (Mantel-Cox) test. A critical value for significance of  $p < 0.05$  was used throughout the study. For the larvae transplants, trend lines of GFP area between the three time-points (1, 4 and 7 days-post injection) per transplanted zebrafish were calculated using Microsoft Excel 2010 software. Slopes averages were compared between each two conditions using unpaired t-test with the Software GraphPad Prism 6.

### **Senescence-associated $\beta$ -galactosidase assay**

$\beta$ -galactosidase assay was performed as previously described (43). Briefly, sacrificed zebrafish larvae were fixed over-night in 4% paraformaldehyde in PBS at 4°C and then washed three times for 1 h in PBS-pH 7.4 and for a further 1 h in PBS-pH 6.0 at 4°C.  $\beta$ -galactosidase staining was performed for 10h at 37°C in 5 mM potassium ferrocyanide, 5 mM potassium ferricyanide, 2mM MgCl<sub>2</sub> and 1 mg/ml X-gal, in PBS adjusted to pH 6.0. After staining, larvae were washed three times for 5 minutes in PBS pH 7, observed and photographed using a bright filter stereoscope (Leica M205FA).

### **Real-time quantitative PCR**

4dpf larvae were sacrificed, immediately snap-frozen in liquid nitrogen and collected in Eppendorf tube, minimum 10 larvae each. RNA extraction was performed using a RNeasy extraction kit (Qiagen, UK # 50974134). Briefly, larvae were smashed in RLT lysis buffer (provided by the kit) and the extract was washed and RNAs isolated through RNA binding

column and eluted in dH<sub>2</sub>O RNase-free, according to manufacture procedures. Quality of RNA samples was assessed through BioAnalyzer (Agilent 2100, CA, USA). Retro-transcription into cDNA was performed using a RT-PCR kit NZY First-Strand cDNA Synthesis Kit # MB12501 (NZYtech). Quantitative PCR (qPCR) was performed using iTaq Universal SYBR Green Supermix # 1725125 (Bio-Rad) and an ABI-QuantStudio 384 Sequence Detection System (Applied Biosystems, CA, USA). qPCRs were carried out in triplicate for each cDNA sample. Relative mRNA expression was normalized to rpl13 mRNA expression using the DCT method. Primer sequences are listed in Table S1.

**Table S1 – List of primers used in RT-qPCR expression analysis and *tert* genotyping.**

| Gene name                     | Primer sequences                                                                |
|-------------------------------|---------------------------------------------------------------------------------|
| <i>p15/16</i>                 | forward – 5' GGATGAACTGACCACAGCAGCA 3'<br>reverse – 5' CGGCTGCGGAAAGAGTCTCAG 3' |
| <i>p21</i>                    | forward – 5' ATGCAGCTCCAGACAGATGA 3'<br>reverse – 5' CGCAAACAGACCAACATCAC 3'    |
| <i>TNF<math>\alpha</math></i> | forward – 5' AGGCAATTTCACTTCCAAGGC 3'<br>reverse – 5' GGTCTTGGTCATCTCTCCAGT 3'  |
| <i>RPL13</i>                  | forward – 5' TTCACCACCACAGCCGAAAGA 3'<br>reverse – 5' TACCGCAAGATTCCATACCCA 3'  |

## Acknowledgements

We thank members of the Telomeres and Genome Stability Laboratory for helpful discussions. We are grateful to Yi Feng (U of Edinburgh), Thiago Carvalho (Fundação Champalimaud) and Leonor Saúde (Instituto de Medicina Molecular) for critically reading our manuscript. We thank the Instituto Gulbenkian de Ciência histology unit and the Fish

Facility for excellent animal care. KL was a recipient of a Portuguese Fundac  o para a Cie ncia e a Tecnologia (FCT) fellowship SFRH/BD/52173/2013. This work was supported by the FCT (PTDC/BIM-ONC/3402/2014 and PTDC/SAU-ONC/116821/2010) and the Howard Hughes Medical Institute grants received by MGF.

## Author contributions

Conceived and designed the experiments: MGF KL MF and MMG. Performed the experiments: KL MMG MF MM BLB KG. Analysed the data: KL MMG MF TC MGF. Contributed reagents/materials/analysis tools: KL MMG MF MM BLB KG TC MGF. Wrote the paper: MGF KL MMG.

## References

1. Parkin DM, Pisani P, Ferlay J (1999) Global cancer statistics. *CA Cancer J Clin* 49(1):33–64.
2. Aubert G, Lansdorp PM (2008) Telomeres and Aging. *Physiol Rev* 88(2):557–579.
3. Palm W, de Lange T (2008) How shelterin protects mammalian telomeres. *Annu Rev Genet* 42:301–334.
4. Samassekou O, Gadji M, Drouin R, Yan J (2010) Sizing the ends: Normal length of human telomeres. *Ann Anat - Anat Anzeiger* 192(5):284–291.
5. Zhang X, Mar V, Zhou W, Harrington LA, Robinson MO (1999) Telomere shortening and apoptosis in telomerase-inhibited human tumor cells. *Genes & Dev* 13(18):2388–2399.
6. Fagagna F d’Adda di, et al. (2003) A DNA damage checkpoint response in telomere-initiated senescence. *Nature* 426(6963):194–198.
7. Lechel A, et al. (2005) The cellular level of telomere dysfunction determines induction of senescence or apoptosis in vivo. *EMBO Rep* 6(3):275–281.
8. Harley C (2008) Telomerase and cancer therapeutics. *Nat Rev Cancer* 8(3):167–179.
9. Shay JW, Wright WE (2011) Role of telomeres and telomerase in cancer. *Semin Cancer Biol* 21(6):349–353.
10. Armanios M, Blackburn EH (2012) The telomere syndromes. *Nat Rev Genet* 13(10):693–704.
11. Holohan B, Wright WE, Shay JW (2014) Telomeropathies: An emerging spectrum disorder. *J Cell Biol* 205(3):289–299.
12. Alter BP, Giri N, Savage SA, Rosenberg PS (2009) Cancer in dyskeratosis congenita. *Blood*. doi:10.1182/blood-2008-12-192880.
13. Carneiro MC, et al. (2016) Short Telomeres in Key Tissues Initiate Local and

- 502 Systemic Aging in Zebrafish. *PLOS Genet* 12(1):e1005798.
- 503 14. Coppé J-P, et al. (2008) Senescence-Associated Secretory Phenotypes Reveal Cell-  
504 Nonautonomous Functions of Oncogenic RAS and the p53 Tumor Suppressor. *PLoS*  
505 *Biol* 6(12):e301.
- 506 15. Coppé J-P, Desprez P-Y, Krtolica A, Campisi J (2010) The Senescence-Associated  
507 Secretory Phenotype: The Dark Side of Tumor Suppression. *Annu Rev Pathol Mech*  
508 *Dis*. doi:10.1146/annurev-pathol-121808-102144.
- 509 16. Feng Y, Renshaw S, Martin P (2012) Live Imaging of Tumor Initiation in Zebrafish  
510 Larvae Reveals a Trophic Role for Leukocyte-Derived PGE2. *Curr Biol* 22(13):1253–  
511 1259.
- 512 17. Feng Y, Martin P (2015) Imaging innate immune responses at tumour initiation: New  
513 insights from fish and flies. *Nat Rev Cancer*. doi:10.1038/nrc3979.
- 514 18. Cao Y, et al. (2016) Population-wide Impact of Long-term Use of Aspirin and the Risk  
515 for Cancer. *JAMA Oncol* 2(6):762.
- 516 19. Gamba CA, et al. (2013) Aspirin is associated with lower melanoma risk among  
517 postmenopausal Caucasian women: The Women’s Health Initiative. *Cancer*.  
518 doi:10.1002/cncr.27817.
- 519 20. Rothwell PM, et al. (2011) Effect of daily aspirin on long-term risk of death due to  
520 cancer: analysis of individual patient data from randomised trials. *Lancet*  
521 377(9759):31–41.
- 522 21. Kim IS, et al. (2017) Microenvironment-derived factors driving metastatic plasticity in  
523 melanoma. *Nat Commun* 8(1):14343.
- 524 22. Tobia C, Gariano G, De Sena G, Presta M (2013) Zebrafish embryo as a tool to study  
525 tumor/endothelial cell cross-talk. *Biochim Biophys Acta - Mol Basis Dis*.  
526 doi:10.1016/j.bbdis.2013.01.016.
- 527 23. Michailidou C, et al. (2009) Dissecting the roles of Raf- and PI3K-signalling pathways  
528 in melanoma formation and progression in a zebrafish model. *Dis Model & Mech*  
529 2(7–8):399–411.
- 530 24. Henriques CM, Carneiro MC, Tenente IM, Jacinto A, Ferreira MG (2013) Telomerase  
531 is required for zebrafish lifespan. *PLoS Genet* 9(1):e1003214.
- 532 25. AI B, C C (2007) TUMOR CELL MORPHOLOGY. *Comparative Oncology*.
- 533 26. Fior R, et al. (2017) Single-cell functional and chemosensitive profiling of  
534 combinatorial colorectal therapy in zebrafish xenografts. *Proc Natl Acad Sci U S A*  
535 114(39). doi:10.1073/pnas.1618389114.
- 536 27. Moore JC, Langenau DM (2016) Allograft Cancer Cell Transplantation in Zebrafish.  
537 *Advances in Experimental Medicine and Biology*, pp 265–287.
- 538 28. Anachelin M, et al. (2013) Premature aging in telomerase-deficient zebrafish. *Dis*  
539 *Model & Mech* 6(5):1101–1112.
- 540 29. Henriques CM, Carneiro MC, Tenente IM, Jacinto A, Ferreira MG (2013) Telomerase  
541 Is Required for Zebrafish Lifespan. *PLoS Genet* 9(1).  
542 doi:10.1371/journal.pgen.1003214.
- 543 30. Harley C, et al. (1992) Telomere length predicts replicative capacity of human  
544 fibroblasts. *Proc Natl Acad Sci U S A* 89(21):10114–10118.
- 545 31. Renshaw SA, et al. (2006) A transgenic zebrafish model of neutrophilic inflammation.  
546 *Blood* 108(13):3976–3978.
- 547 32. Ostrand-Rosenberg S (2008) Immune surveillance: a balance between protumor and  
548 antitumor immunity. *Curr Opin Genet Dev*. doi:10.1016/j.gde.2007.12.007.
- 549 33. Loynes CA, et al. (2018) PGE2 production at sites of tissue injury promotes an anti-  
550 inflammatory neutrophil phenotype and determines the outcome of inflammation  
551 resolution in vivo. *Sci Adv*. doi:10.1126/sciadv.aar8320.

34. Freisinger CM, Huttenlocher A (2014) Live imaging and gene expression analysis in zebrafish identifies a link between neutrophils and epithelial to mesenchymal transition. *PLoS One*. doi:10.1371/journal.pone.0112183.
35. Heidenreich B, Rachakonda PS, Hemminki K, Kumar R (2014) TERT promoter mutations in cancer development. *Curr Opin Genet Dev*. doi:10.1016/j.gde.2013.11.005.
36. Feitsma H, Cuppen E (2008) Zebrafish as a cancer model. *Mol Cancer Res*. doi:10.1158/1541-7786.MCR-07-2167.
37. Novoa B, et al. (2019) Rag1 immunodeficiency-induced early aging and senescence in zebrafish are dependent on chronic inflammation and oxidative stress. *Aging Cell*. doi:10.1111/ace.13020.
38. Maru GB, Gandhi K, Ramchandani A, Kumar G (2014) The Role of Inflammation in Skin Cancer. *Inflammation and Cancer* doi:10.1007/978-3-0348-0837-8.
39. Tang L, Wang K (2016) Chronic inflammation in skin malignancies. *J Mol Signal*. doi:10.5334/1750-2187-11-2.
40. Shalapour S, Karin M (2015) Immunity, inflammation, and cancer: An eternal fight between good and evil. *J Clin Invest*. doi:10.1172/JCI80007.
41. White RM, et al. (2008) Transparent Adult Zebrafish as a Tool for In Vivo Transplantation Analysis. *Cell Stem Cell*. doi:10.1016/j.stem.2007.11.002.
42. Cooper MS, et al. (2005) Visualizing morphogenesis in transgenic zebrafish embryos using BODIPY TR methyl ester dye as a vital counterstain for GFP. *Dev Dyn*. doi:10.1002/dvdy.20252.
43. Kishi S, et al. (2008) The identification of zebrafish mutants showing alterations in senescence-associated biomarkers. *PLoS Genet* 4(8). doi:10.1371/journal.pgen.1000152.

## Figure Legends

### Figure 1. Short telomeres promote tumorigenesis in a non-cell autonomous manner. A)

Experimental setup for the generation of zebrafish chimeras. Donor cells are transplanted from a Tg(*mitfa:HRAS<sup>G12V</sup>*; *β-actin:GFP*) embryo at the blastula stage into embryos resulting from an incross of *tert*<sup>+/-</sup>; Casper zebrafish. B) Representative images of adult chimera zebrafish harboring melanoma in either WT or *tert*<sup>-/-</sup> recipients. C) Melanoma occurrence over time in chimeric fish. *tert*<sup>-/-</sup> recipient fish have a higher risk of tumorigenesis than WT recipient fish (p<0.05).

### Figure 2. *tert*<sup>-/-</sup> tissues increase melanoma invasiveness and progression. A) H&E images

of melanoma arising in a wildtype (upper panel) or *tert*<sup>-/-</sup> recipient fish. Strong infiltration into other tissues was typical in *tert*<sup>-/-</sup> fish but not in wildtype (arrowheads). B) Melanoma

were staged according to histopathology into benign lesions (melanosis), non-invasive and invasive malignant tumors. C) Analysis of malignant tumors for cellular atypia. Sample numbers are indicated within the bars.

**Figure 3. G2 *tert*<sup>-/-</sup> larvae with very short telomeres exhibit increased melanoma**

**micrometastasis.** A) Experimental design for melanoma allotransplants in zebrafish larvae.

Melanoma tumors were dissociated from *mitfa:HRAS*; *β-actin:GFP* zebrafish. HRAS

melanoma cells were then injected into blood circulation of 2dpf zebrafish larvae. Larvae

were kept in embryo medium for 7 days post injection (7dpi). B) Representative images of

HRAS melanoma cells spread (green) in WT or G2 *tert*<sup>-/-</sup> larvae at 7dpi. C) Time-course of

HRAS melanoma cells spread in a group of WT and G2 *tert*<sup>-/-</sup> larvae ( $p < 0.01$  at 7dpi, WT

N=10 and G2 *tert*<sup>-/-</sup> N=11). D) Melanoma tumors are more invasive in G2 *tert*<sup>-/-</sup> larvae

( $p = 0.0205$ , WT N=32 and G2 *tert*<sup>-/-</sup> N=31). A linear regression of three time-points (1, 4 and

7 dpi) was used to calculate the slope of melanoma invasiveness. Each dot represents one

larvae allotransplant.

**Figure 4. Telomerase deficient tissues present higher levels of senescence and**

**inflammation and modulate their environment.** A, B, C) RT-qPCR analysis comparing the

expression levels of *ink4ab* (p16/15), *cdkn2a* (p21) and *tnfa* (TNF) of 4dpf WT and G2 *tert*<sup>-/-</sup>

larvae and 9month WT and *tert*<sup>-/-</sup> adult intestine tissue (\*  $p < 0.05$ , \*\*  $p < 0.01$  N=30). D)

Representative images of SA-β-Gal assay comparing WT and G2 *tert*<sup>-/-</sup> 4dpf zebrafish

embryos. Yolk sack staining is nonspecific. E) Scheme for generating chimeras in which G2

*tert*<sup>-/-</sup> blastula cells are transplanted into WT embryos (G2 *tert*<sup>-/-</sup> → WT). SA-β-Gal assay

showing increased senescence in 4dpf WT embryos with injection of G2 *tert*<sup>-/-</sup> cells. F)

Scheme of G2 chimeras generation where WT or G2 *tert*<sup>-/-</sup> blastula cells are transplanted into

WT Tg(*mpx:GFP*) embryos carrying labelled neutrophils with green fluorescent protein:

WT → WT Tg(*mpx:GFP*) vs. G2 *tert*<sup>-/-</sup> → WT Tg(*mpx:GFP*). Representative images of the

chimeras at 4dpf, neutrophils are represented at green; G) Quantification of neutrophils at 4dpf. Non-injected Tg(*mpx:GFP*) were used as controls. Each data point represents one zebrafish (\*\*  $p < 0.01$ , non-injected N=24, WT N=33 and TERT N=25).

**Figure 5. Increased tumor invasiveness in G2 *tert*<sup>-/-</sup> larvae is rescued by inhibiting inflammation.** A) Allotransplants of primary tumor cells extracted from melanoma in adult fish into 2dpf larvae that were kept in embryo medium containing Aspirin or Celecoxib (COX-2 selective inhibitor). B) Representative images of melanoma invasiveness at 7dpi upon Aspirin treatment. C) Time-course of melanoma invasiveness in WT and G2 *tert*<sup>-/-</sup> larvae under Aspirin treatment. D) Slope of HRAS melanoma spread between 1, 4 and 7dpi. Comparison of invasiveness in a WT or G2 *tert*<sup>-/-</sup> either untreated (Control) or containing Aspirin (WT N=26 and G2 *tert*<sup>-/-</sup> N=29) or Celecoxib (WT N=19 and G2 *tert*<sup>-/-</sup> N=13). Each dot represents one zebrafish larva from 2-3 biological replicates.

**Supplementary Figure 1. *tert* genetic status of chimera recipients does not influence the number of melanocytes in larvae or adults.** A) Representative images of 3dpf chimeras exhibiting high (left) and low (right) number of melanocytes. Blastula *mitfa:HRAS*;  $\beta$ -actin:GFP cells were injected into the same stage embryos resulting from an incross of *tert*<sup>+/-</sup>; Casper. Larvae were genotyped at 3dpf and followed individually until 11dpf. B) No significant differences can be observed between the number of melanocytes in hosts of different *tert* genotype, both at 3dpf and 11dpf. Each point in the graph represents an individual animal. Data are represented as mean  $\pm$  SEM. C) Chimeras harboring a tumor were analyzed for extent of pigmentation in adults. Left side animals with high pigmentation, right side: low pigmentation. C) Quantification of pigmented area given as in percent of total surface. Each datapoint represents one animal (both sides). Pigmented area did not significantly differ depending on the host genotype. Data are represented as mean  $\pm$  SEM.

Figure 1

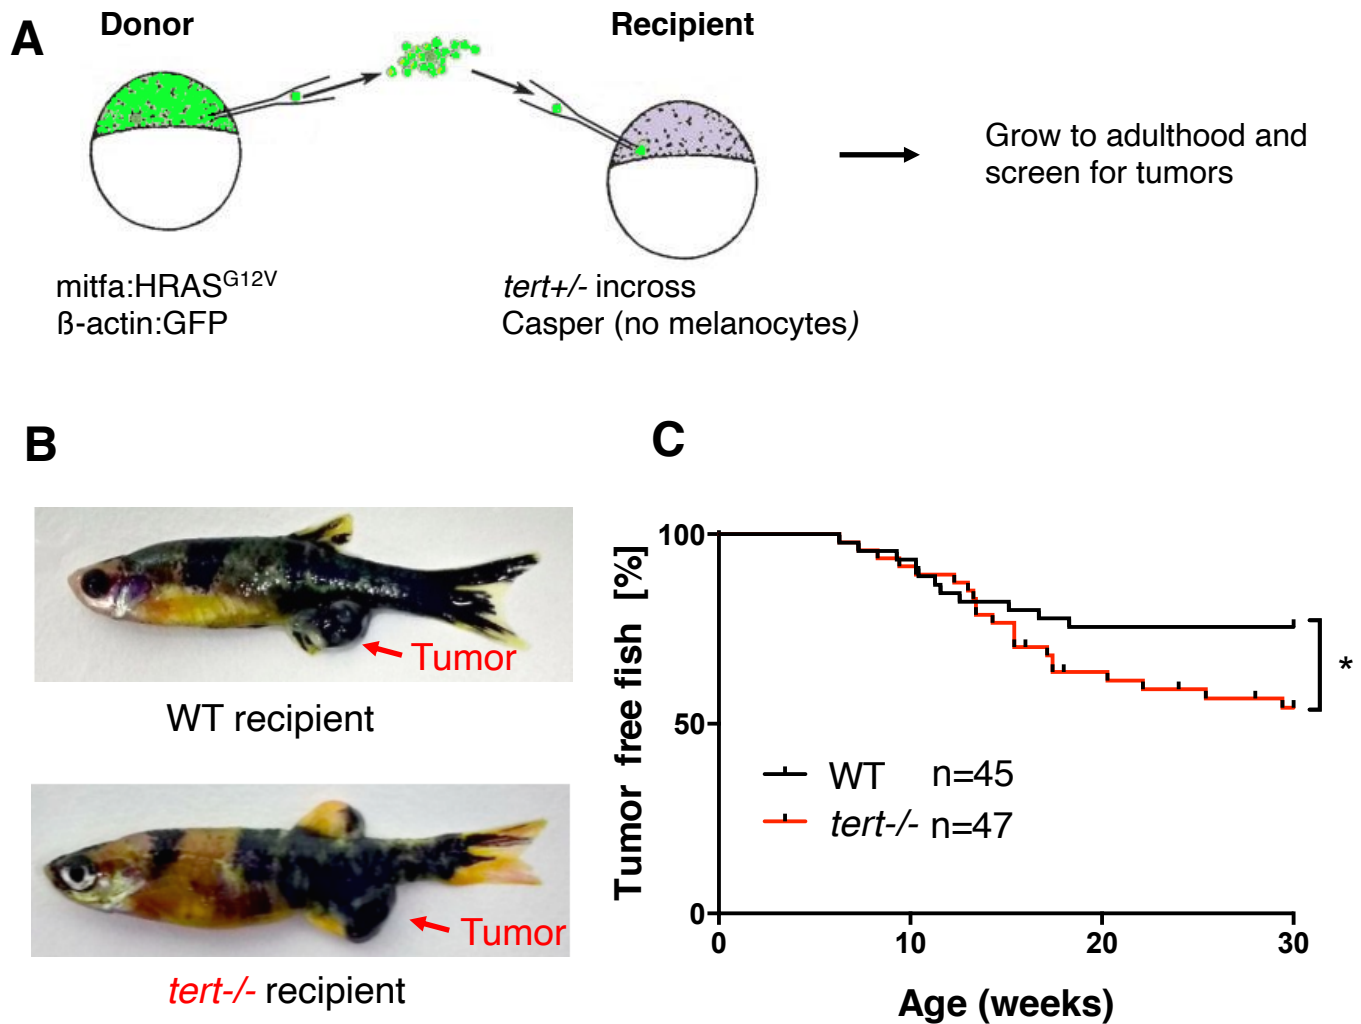

Figure 2

A

WT recipient

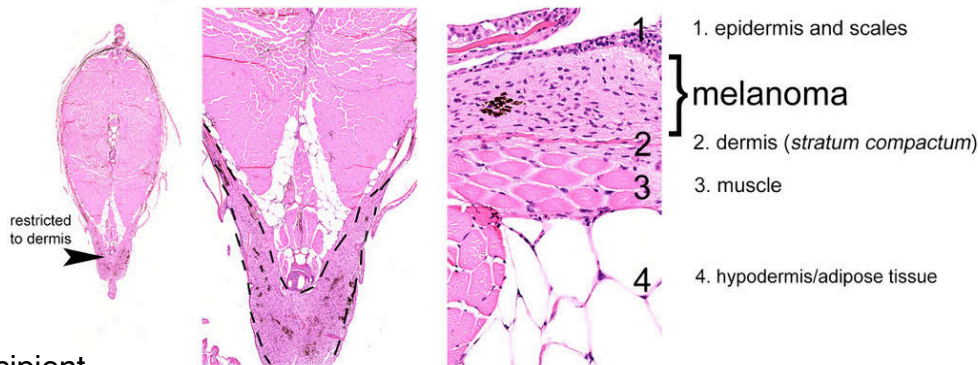

*tert*<sup>-/-</sup> recipient

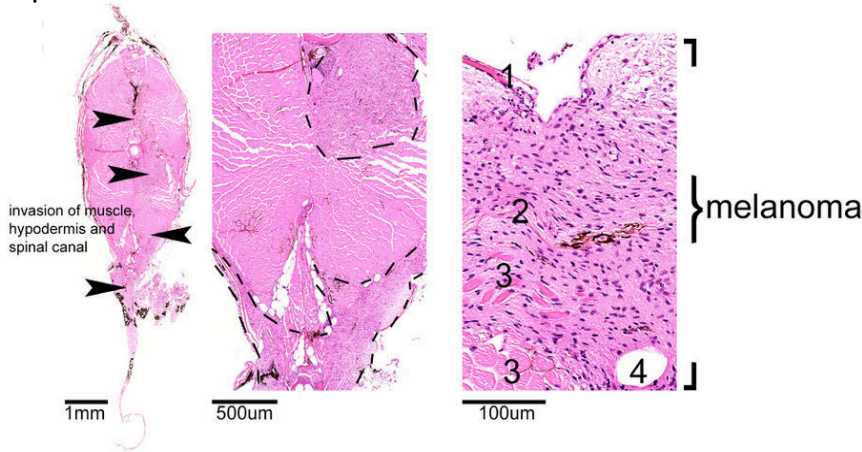

B

Tumor staging

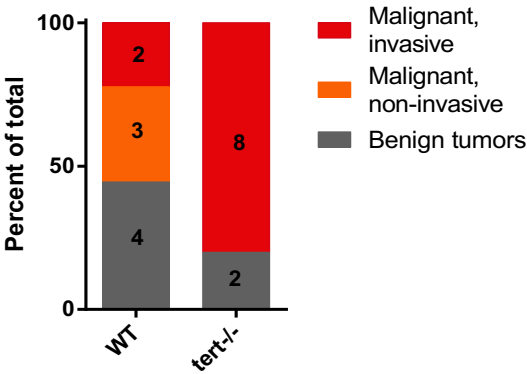

C

Cellular atypia

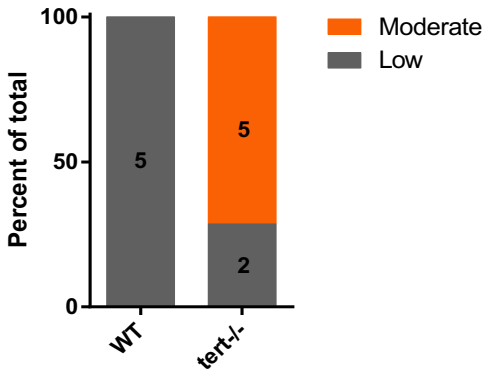

Figure 3

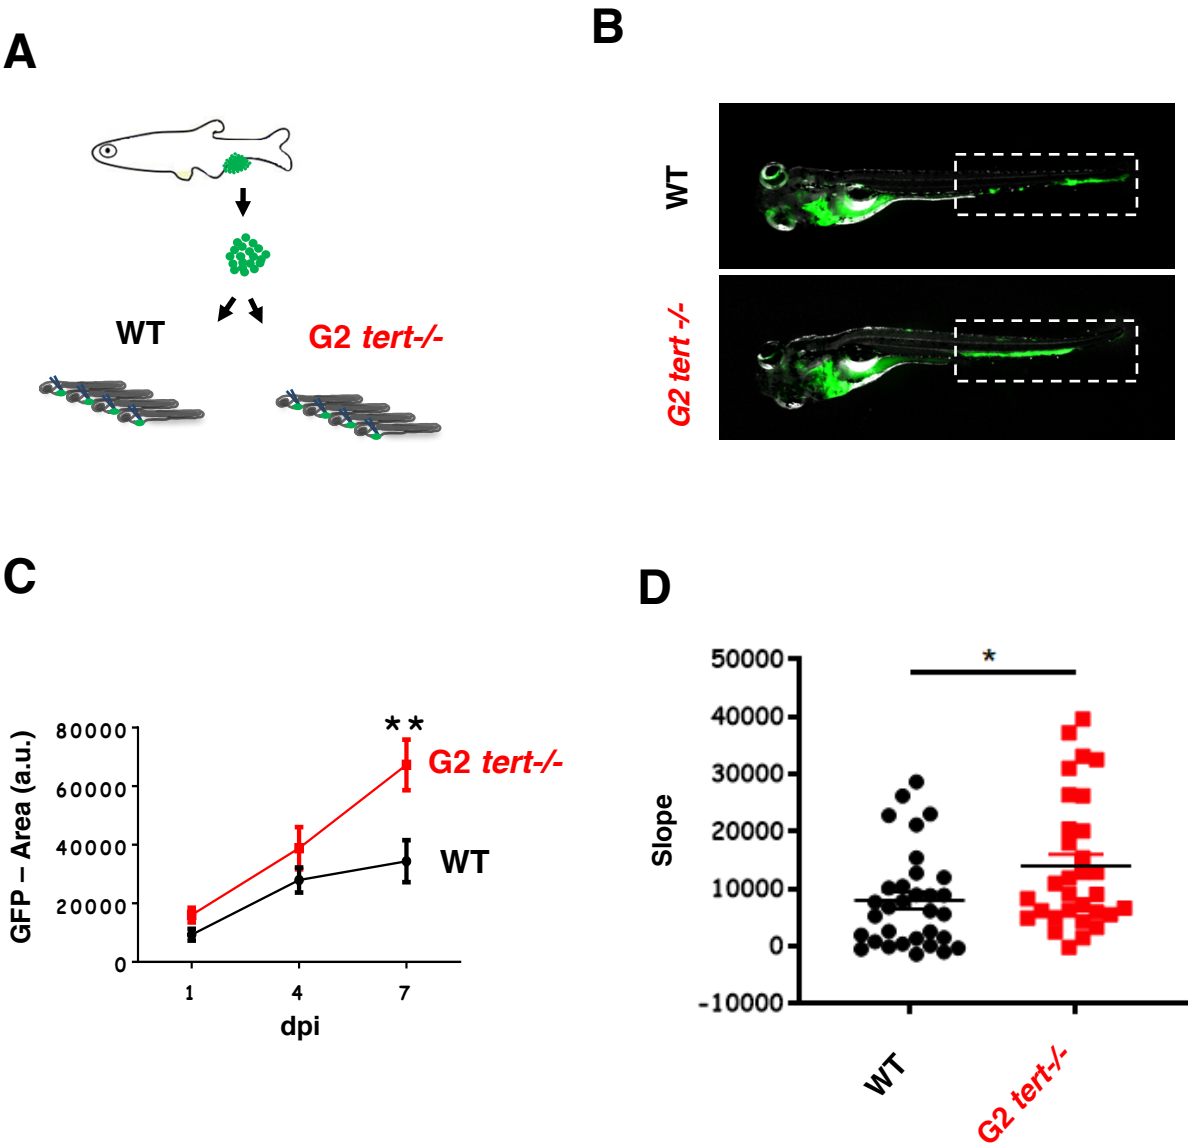

Figure 4

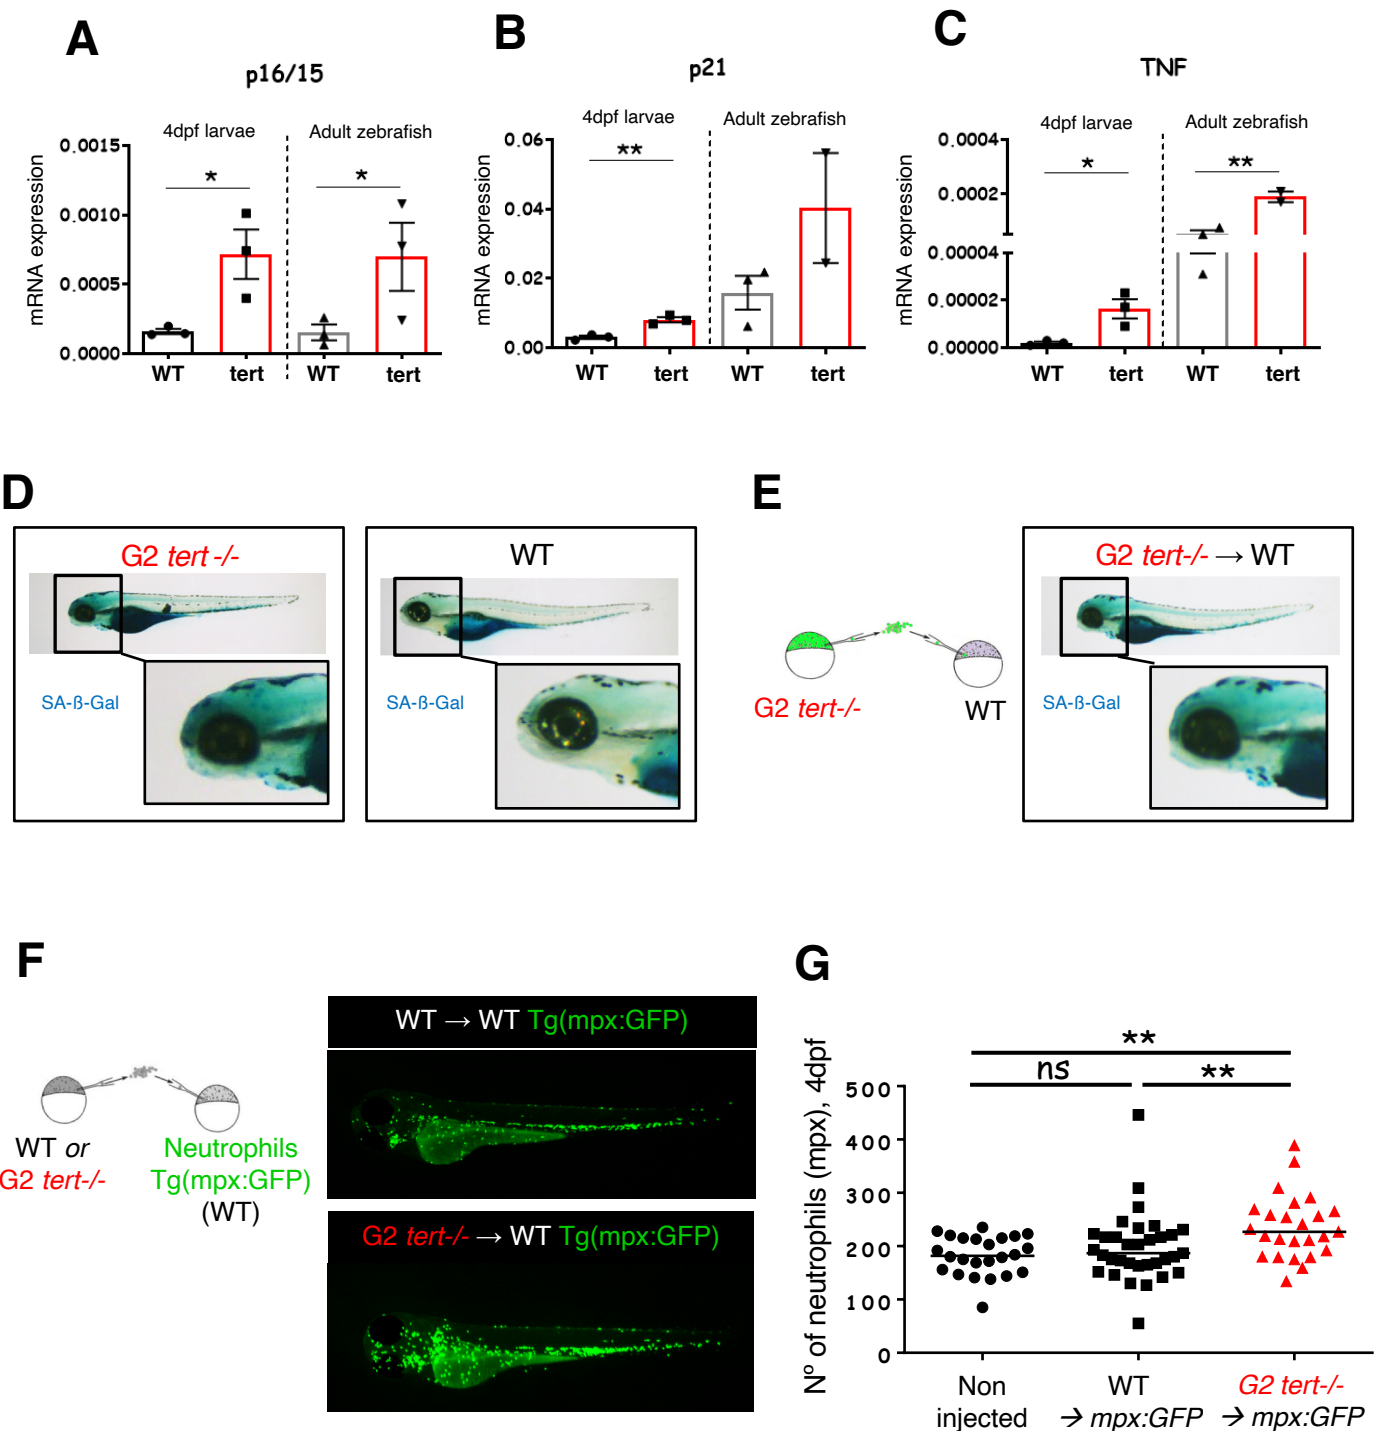

Figure 5

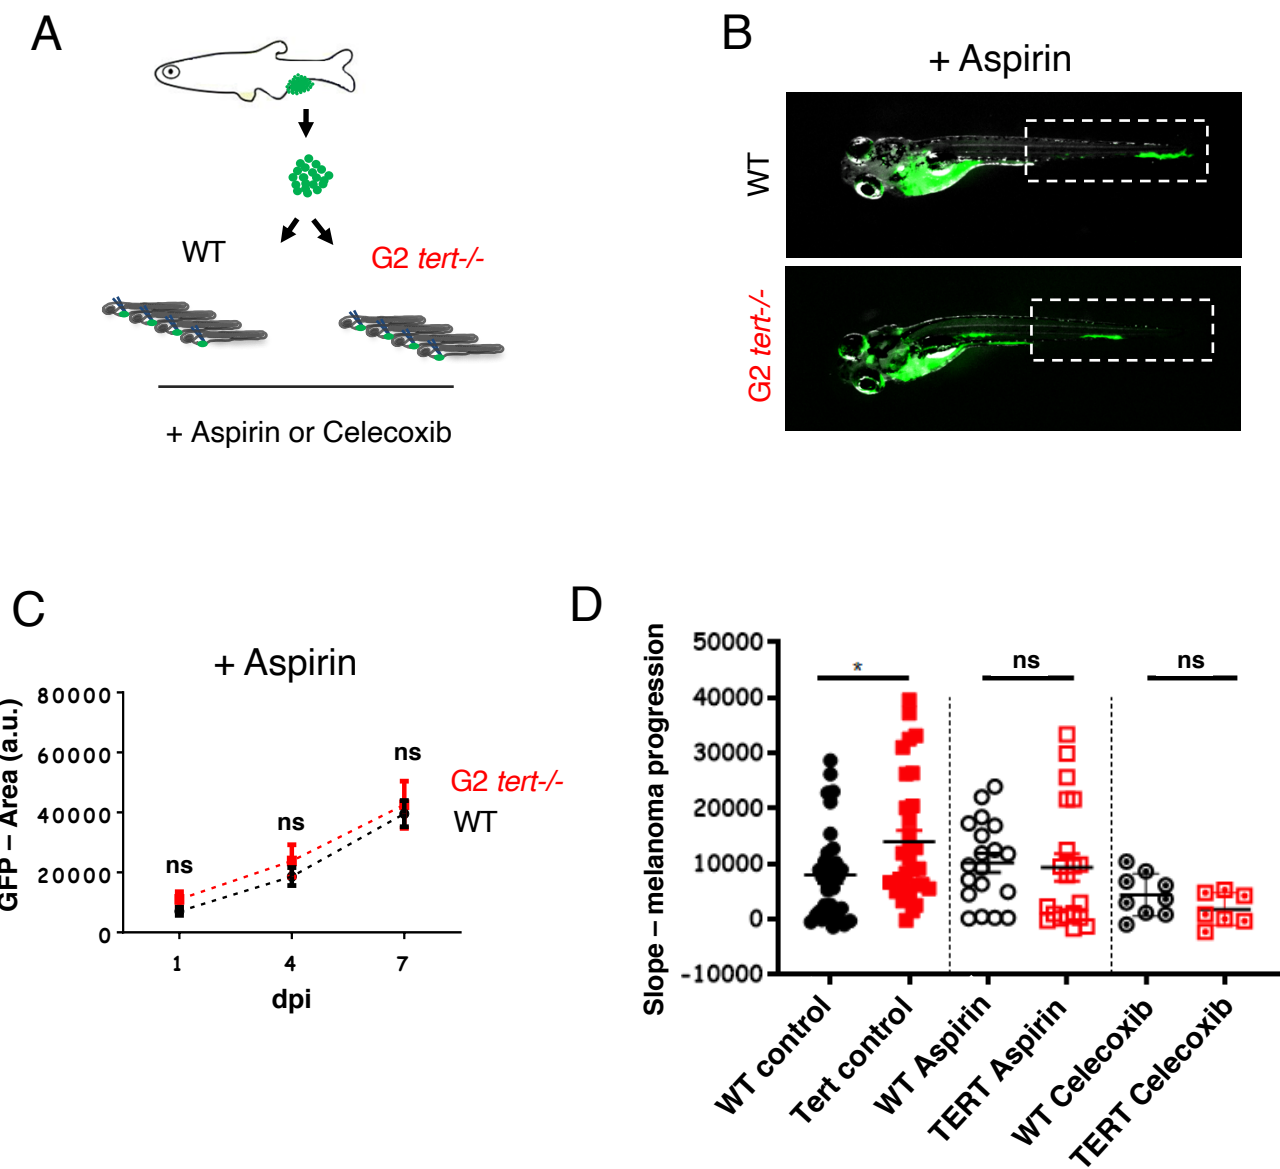

Supplementary Figure 1

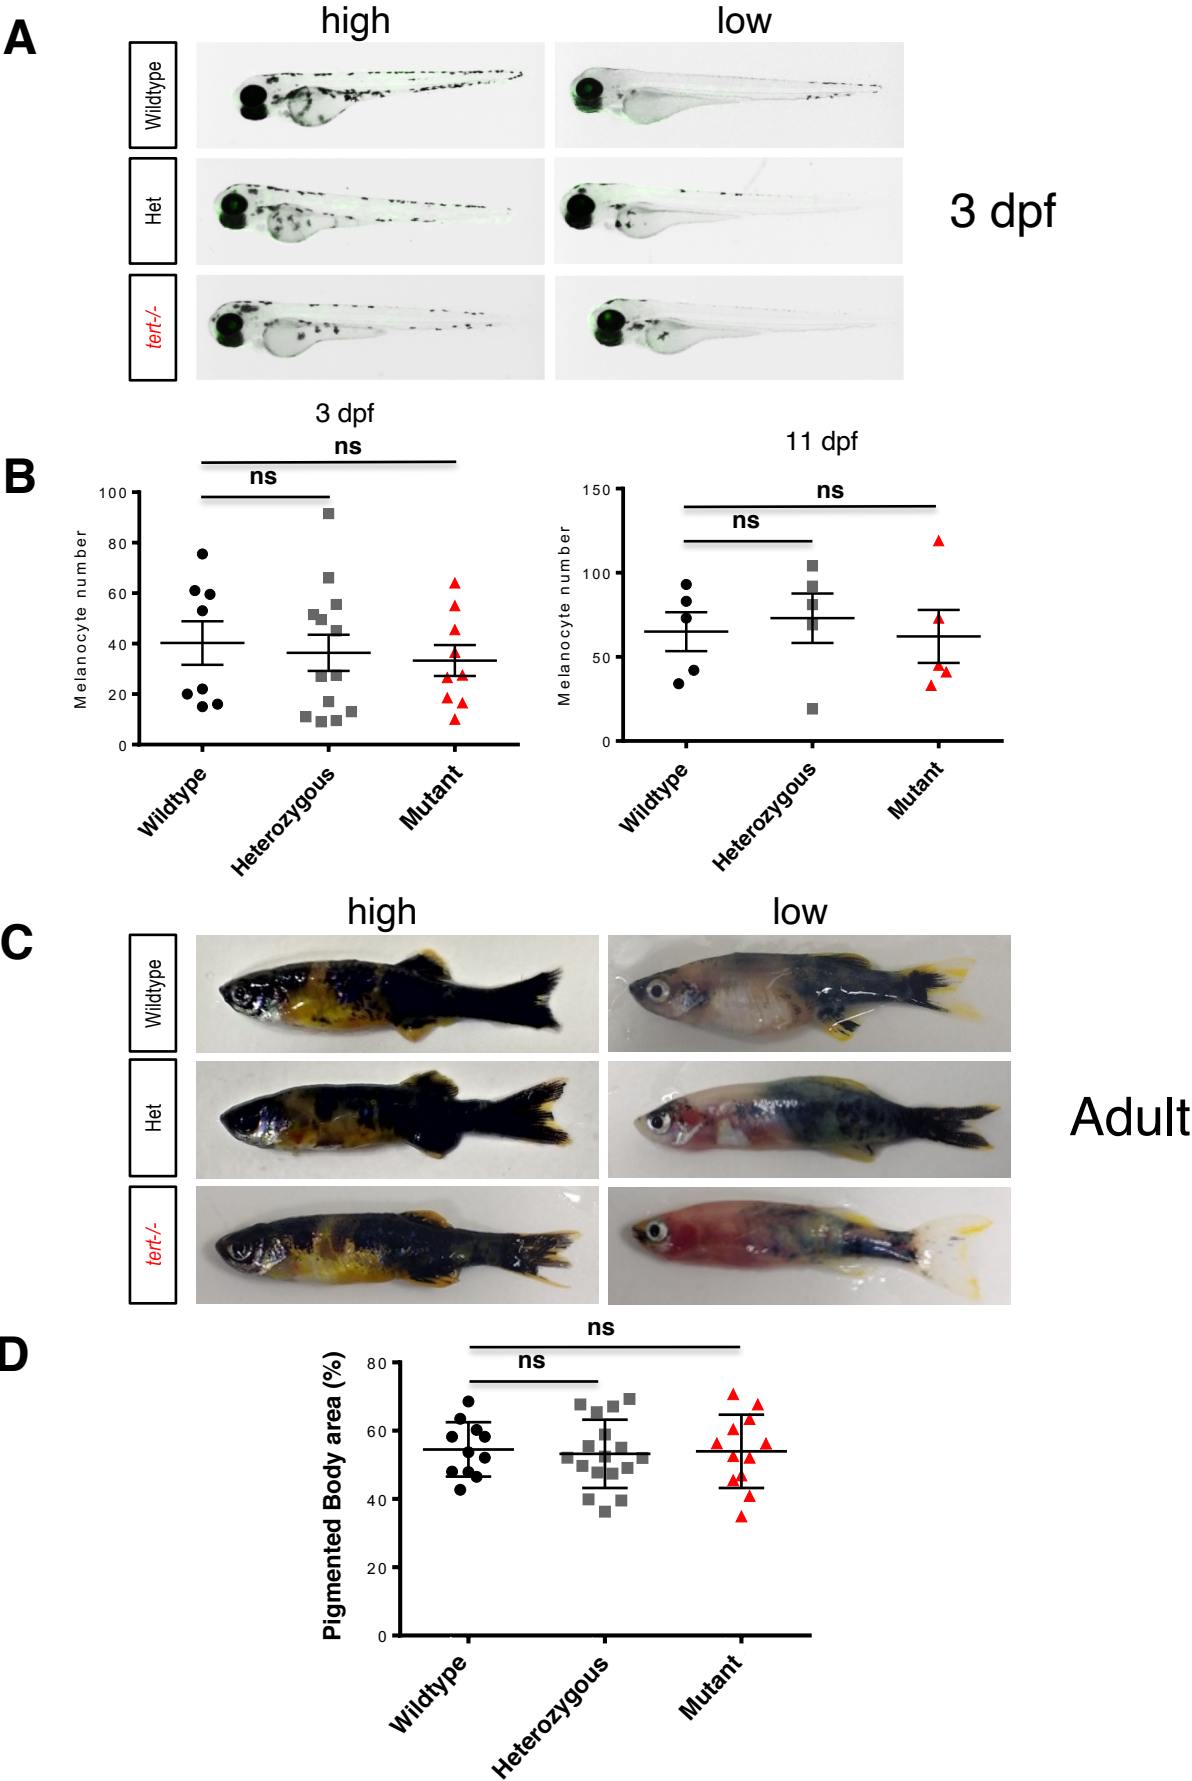

Source: https://www.biorxiv.org/content/10.1101/844084v1.full.pdf
